# Supplementary material for: Investigation of Metabolome Underlying the Biological Mechanisms of Acute Heat Stressed Granulosa Cells
Source: MDPI journal article supplement (doi:10.3390/ijms23042146), 2022-02-15
Supplement: s1 [file s1]

## **Investigation of metabolome underlying the biological mechanisms of acute heat stressed granulosa cells**

### **Supplementary materials:**

**Supplementary Figure S1:** Comparison of physical parameters of bovine granulosa cells (bGCs) exposed to heat stress (43°C) versus control (38°C). bGCs proliferation curves are plotted against different recovery time points in hours (h) for control and heat stress group (A), where MC is the medium change and the time points with arrows shows the significant difference among control and heat stress (HS) groups. Fluorescence OD value (measured at 485/535nm wavelength) of bGCs, stained with 2',7'-dichlorofluorescein diacetate (DCFDA), is shown on the Y-axis, and the temperature treatments are indicated on the X-axis (B). Representative fluorescence microscope pictures of late apoptotic (red) and early apoptotic (green) cells after staining with FITC/PI dye for control (C) and heat stress treatment (D) groups. Means comparison of apoptotic rate (sum of red and green events) of bGCs under control and heat stress (E). Data are represented as mean  $\pm$  S.E. of at least three independent cultures with further at least three replicates for each culture. Each panel without common letters is significantly different ( $P < 0.05$ ).

**Supplementary Figure S2:** The total ion current diagrams of all quality control samples from both positive (POS) ion mode (A) and negative (NEG) ion mode (B) are superimposed. Spectra overlap with the retention time on X-axis and peak signal intensity fluctuations on Y-axis are shown. The MS2 component matrix box for POS (C) and NEG (D) ion modes (2,056 and 2,597 MS2 spectra in POS and NEG modes, respectively) from the samples are plotted against the distribution of the mass-to-charge ratio and retention time.

**Supplementary Table S1:** Differential metabolites ROC (Receiver Operator Characteristic) analysis to determine their biomarker prediction values. Results of AUC (area under curve), *P*-values and FC (fold change) are presented.

**Supplementary Table S2:** Results of enrichment analysis of the differential metabolites observed in the study.

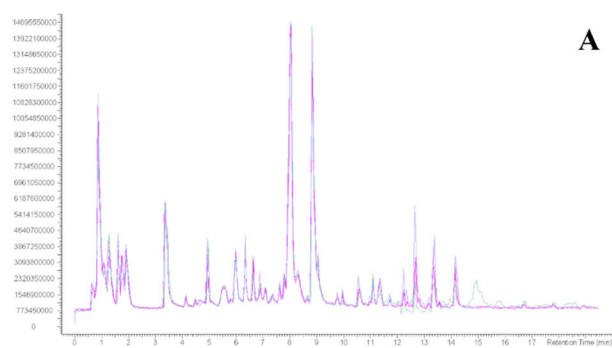

**A**

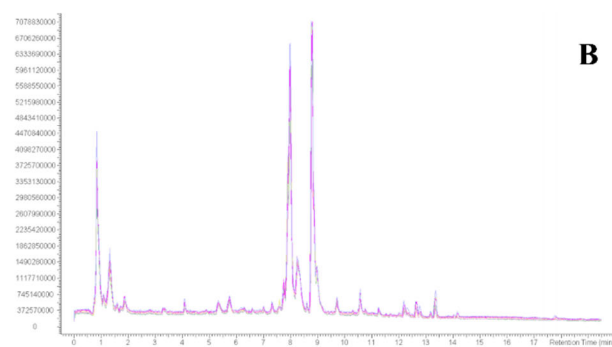

**B**

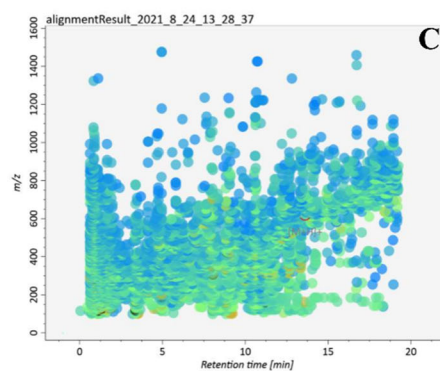

**C**

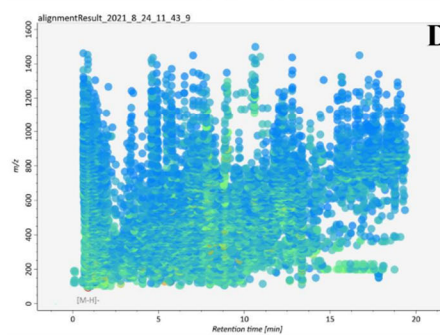

**D**

**Figure S1**

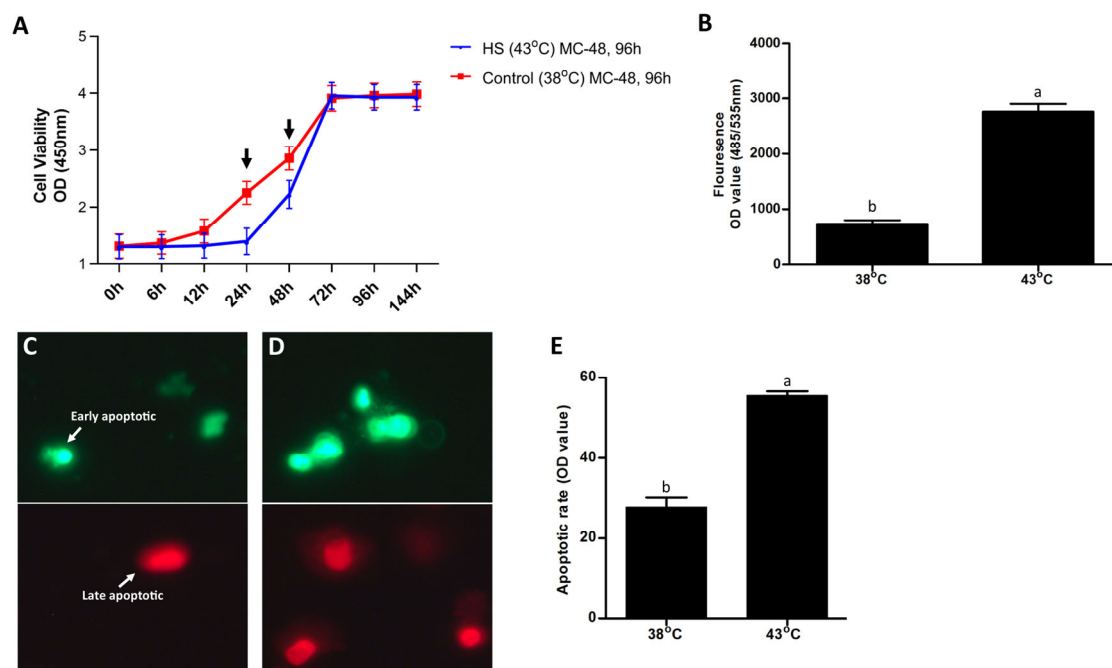

**Figure S2**

**Table S1**

| Metabolites                     | AUC  | Pval   | FC     | clusters |
|---------------------------------|------|--------|--------|----------|
| Choline                         | 1    | 0.009  | -1.109 | 5        |
| 3-Hydroxy-3-methylglutaric acid | 1    | 0.024  | -0.181 | 5        |
| 16-Hydroxyhexadecanoic acid     | 1    | 0.0009 | 0.383  | 2        |
| D-(+)-Galactosamine             | 1    | 0.125  | 0.212  | 2        |
| Ciliatine                       | 1    | 0.014  | 1.344  | 2        |
| AICAR                           | 1    | 0.082  | 0.302  | 2        |
| Citric acid                     | 1    | 0.009  | -1.109 | 5        |
| Glutamine                       | 1    | 0.032  | -0.144 | 2        |
| Glycocyamine                    | 0.89 | 0.093  | 0.313  | 4        |
| Lysine                          | 0.89 | 0.154  | -0.315 | 3        |
| Pyridoxal                       | 0.89 | 0.226  | 1.3292 | 4        |
| Proline                         | 0.89 | 0.288  | 0.238  | 4        |
| Mycophenolic acid               | 0.89 | 0.278  | -0.149 | 4        |
| 4-Nitrophenol                   | 0.89 | 0.100  | -0.185 | 2        |
| D-(+)-Pantothenic acid          | 0.89 | 0.217  | 0.242  | 4        |
| Indole-3-acetaldehyde           | 0.78 | 0.153  | 0.295  | 4        |
| (-)-Riboflavin                  | 0.78 | 0.188  | 0.438  | 4        |
| Sebacic acid                    | 0.78 | 0.311  | 0.083  | 4        |
| L-allo-Threonine                | 0.78 | 0.218  | -0.147 | 2        |
| beta-Guanidinopropionic acid    | 0.78 | 0.225  | 0.210  | 4        |
| Indole-3-carboxyaldehyde        | 0.78 | 0.239  | 0.263  | 4        |
| Threonine                       | 0.78 | 0.325  | 0.155  | 3        |

|                      |      |       |        |   |
|----------------------|------|-------|--------|---|
| Thiamine             | 0.78 | 0.325 | 0.155  | 3 |
| Xanthosine           | 0.78 | 0.335 | 0.156  | 4 |
| L-Tyrosine           | 0.78 | 0.199 | -0.213 | 2 |
| Glutamine            | 0.67 | 0.471 | -0.178 | 2 |
| L-Leucine            | 0.67 | 0.616 | -0.056 | 2 |
| Uridine              | 0.67 | 0.920 | 0.167  | 2 |
| Galactose            | 0.67 | 0.536 | -0.170 | 4 |
| L-(-)-Mandelic acid  | 0.67 | 0.727 | 0.103  | 4 |
| Progesterone         | 0.67 | 0.262 | 1.312  | 5 |
| Xanthine             | 0.67 | 0.549 | 0.185  | 3 |
| L-2-Aminoadipic acid | 0.67 | 0.383 | 0.314  | 5 |
| Urocanic acid        | 0.67 | 0.399 | 0.586  | 5 |
| Succinic acid        | 0.56 | 0.544 | 1.268  | 3 |
| Cholic acid          | 0.56 | 0.513 | 0.332  | 1 |
| Pyridoxine           | 0.56 | 0.989 | -0.059 | 4 |

AICAR: 5-Aminoimidazole-4-carboxamide-1-beta-D-ribofuranosyl 5'-monophosphate

**Table S2**

| Differential Metabolites Enrichment Sets            |       |      |        |
|-----------------------------------------------------|-------|------|--------|
| Metabolites                                         | Total | Hits | Raw p  |
| Glycerophospholipid metabolism                      | 36    | 1    | 0.0308 |
| Glycine, serine and threonine metabolism            | 33    | 3    | 0.0448 |
| Glyoxylate and dicarboxylate metabolism             | 32    | 2    | 0.0646 |
| Phosphonate and phosphinate metabolism              | 6     | 1    | 0.0855 |
| Ubiquinone and other terpenoid-quinone biosynthesis | 9     | 1    | 0.1136 |
| Tyrosine metabolism                                 | 42    | 1    | 0.1136 |
| Phenylalanine metabolism                            | 10    | 1    | 0.1136 |
| Phenylalanine, tyrosine and tryptophan biosynthesis | 4     | 1    | 0.1136 |
| Vitamin B6 metabolism                               | 9     | 2    | 0.1754 |
| Biotin metabolism                                   | 10    | 1    | 0.1973 |
| Steroid hormone biosynthesis                        | 85    | 1    | 0.2814 |
| Citrate cycle (TCA cycle)                           | 20    | 2    | 0.2876 |
| Aminoacyl-tRNA biosynthesis                         | 48    | 6    | 0.2897 |
| Alanine, aspartate and glutamate metabolism         | 28    | 3    | 0.3116 |
| Valine, leucine and isoleucine degradation          | 40    | 1    | 0.3609 |
| Lysine degradation                                  | 25    | 3    | 0.3639 |
| Arginine biosynthesis                               | 14    | 1    | 0.3696 |
| D-Glutamine and D-glutamate metabolism              | 6     | 2    | 0.3696 |
| Nitrogen metabolism                                 | 6     | 1    | 0.3696 |
| Valine, leucine and isoleucine biosynthesis         | 8     | 2    | 0.4764 |
| Purine metabolism                                   | 65    | 3    | 0.4794 |
| Histidine metabolism                                | 16    | 1    | 0.5130 |
| Pyrimidine metabolism                               | 39    | 2    | 0.5520 |
| Thiamine metabolism                                 | 7     | 1    | 0.6710 |

|                                 |    |   |        |
|---------------------------------|----|---|--------|
| Riboflavin metabolism           | 4  | 1 | 0.6964 |
| Primary bile acid biosynthesis  | 46 | 1 | 0.7096 |
| Propanoate metabolism           | 23 | 1 | 0.7351 |
| Butanoate metabolism            | 15 | 1 | 0.7351 |
| Arginine and proline metabolism | 38 | 2 | 0.8849 |
| Tryptophan metabolism           | 41 | 1 | 0.9744 |

---
